# Supplementary material for: A carbon nanotube-confined iron modified cathode with prominent stability and activity for heterogeneous electro-Fenton reactions
Source: Royal Society of Chemistry journal article supplement (doi:10.1039/c9ta07491k), 2019-01-01
Supplement: c9ta07491k1.pdf [file c9ta07491k1.pdf]

**Carbon nanotubes confined iron modified cathode with prominent stability and activity for heterogeneous electro-Fenton**

Pei Su<sup>a,b,c,d</sup>, Minghua Zhou<sup>a,b,c,d</sup>\*, Gengbo Ren<sup>a,b,c,d</sup>, Xiaoye Lu<sup>a,b,c,d</sup>, Xuedong Du<sup>a,b,c,d</sup>, Ge Song<sup>a,b,c,d</sup>

<sup>a</sup> Key Laboratory of Pollution Process and Environmental Criteria, Ministry of Education, College of Environmental Science and Engineering, Nankai University, Tianjin 300350, China.

<sup>b</sup> Tianjin Key Laboratory of Environmental Technology for Complex Trans-Media Pollution, Nankai University, Tianjin 300350, China

<sup>c</sup> Tianjin Key Laboratory of Urban Ecology Environmental Remediation and Pollution Control, College of Environmental Science and Engineering, Nankai University, Tianjin 300350, China

<sup>d</sup> Tianjin Advanced Water Treatment Technology International Joint Research Center, College of Environmental Science and Engineering, Nankai University, Tianjin 300350, China

---

\* Corresponding author. Tel/Fax: +86 022 23501117. E-mail address: zhousmh@nankai.edu.cn (M. Zhou).

## 1 Analytical methods

2 **H<sub>2</sub>O<sub>2</sub> measurement:** At time intervals, 0.5 mL samples were taken for analyzing. And 0.5 mL  
3 potassium titanium (IV) oxalate solution (0.05 mol/L) and 0.5 ml H<sub>2</sub>SO<sub>4</sub> (3 mol/L) were added  
4 into samples to analyze absorbance at  $\lambda=400$  nm with the UV-vis spectrophotometer (UV759).

5 **Total iron measurement:** At time intervals, 1 mL samples were taken for analyzing the iron  
6 concentration. And 0.5 mL buffer solution (HAc-NaAc buffer solution, pH=4.6), 0.25 ml  
7 hydroxylamine hydrochloride ( $\omega=1.0\%$ ) and 0.5 mL 1,10-phenanthroline monohydrat ( $\omega=0.1\%$ )  
8 were added into samples to analyze absorbance at  $\lambda=510$  nm with the UV-vis spectrophotometer.

9 **Hydroxyl radicals measurement ( $\cdot\text{OH}$ ):** For the quantitative determination of  $\cdot\text{OH}$ , dimethyl  
10 sulfoxide (DMSO, 0.2%) was first trapped in solution. And 1 mL samples were taken for  
11 analyzing. 2, 4-dinitrophenylhydrazine (DNPH, 0.2 mL), and phosphate buffer solutions (pH=4,  
12 1.25 mL) were added into samples to form the corresponding hydrazine (HCHO-DNPH), which  
13 was determined by high performance liquid chromatography (Ultimate 3000, ThermoFisher,  
14 America) equipped with a BEH C18 column at a flow rate of 0.1 mL/min (1.7  $\mu\text{m}$ ,  $\phi$  2.1 $\times$ 100 mm).  
15 The mobile phase was methanol/water (% V/V = 60: 40) and 355 nm was chosen for detection.

16 **Pollutants removal measurement:** The experiments of phenol removal were performed at  
17 current of 60 mA. 0.5 mL sample was taken to analyze pollutants removal a time intervals. It was  
18 determined by same HPLC equipped with C18 column (3  $\mu\text{m}$ ,  $\phi$ 3.0 $\times$ 100 mm) and DAD detector  
19 at 0.3 mL/min. The mobile phase was methanol/water/glacial acetic acid (% V/V/V = 30: 19: 1)  
20 and 280 nm was chosen for detection.

21 Electric energy consumption (EEC) could be calculated by the following formula:<sup>1</sup>

$$22 \quad \text{EEC} = \frac{1000UIt}{CV_s} \quad (1)$$

1 Where U is the voltage (V), I is the current (A), t is the time (h),  $V_s$  is the bulk volume (L), and C  
2 is the concentration of  $H_2O_2$  (mg/L).

### 3 **Exchange current density:**

4 The exchange current density ( $i_0$ ) was calculated from the Tafel equation: <sup>1</sup>

5 
$$\lg\left(\frac{i}{i_0}\right) = \frac{\beta F \eta}{2.303 RT} \quad (2)$$

6 Where  $\eta$  is the cathodic overpotential (V), R is the ideal gas constant (8.31 J/mol•K), T is the  
7 absolute temperature (K),  $\beta$  is the symmetry factor (a constant), F is the Faraday constant (96485  
8 C/mol), i is the current density (mA/m<sup>2</sup>) and  $i_0$  is the exchange current density (mA/m<sup>2</sup>). The  
9 linear Tafel regression ( $R^2 \geq 0.99$ ) exists in the overpotential interval of 80 and 100 mV.

10

11

12

13

14

15

16

17

18

19

20

21

22

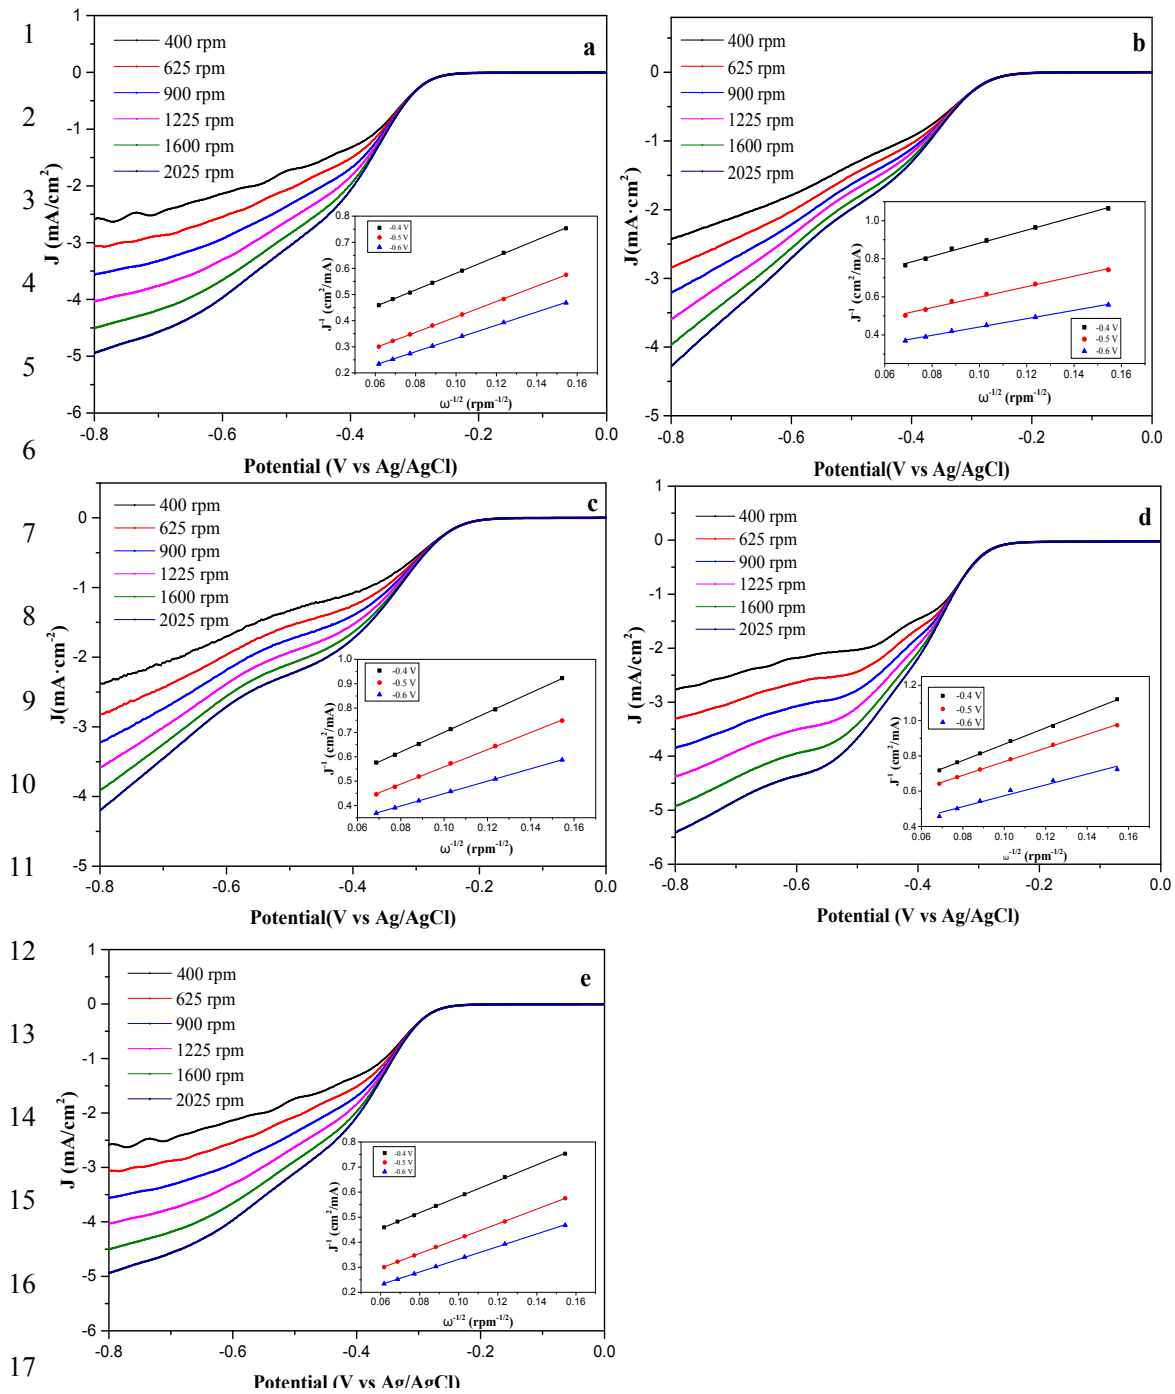

**Figure S1** LSV by RDE for CNTs, Fe-in/out-CNTs, and Fe<sup>0</sup>-in/out-CNTs (a-e)

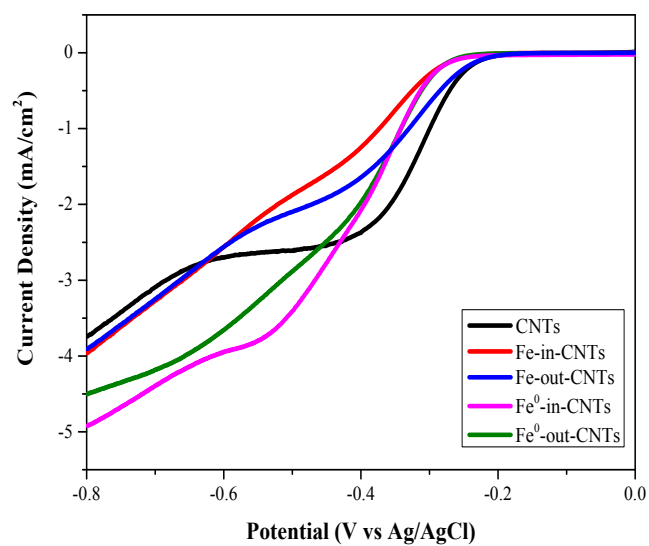

**Figure S2** LSV at 1600 rpm for CNTs, Fe-in/out-CNTs, Fe<sup>0</sup>-in/out-CNTs

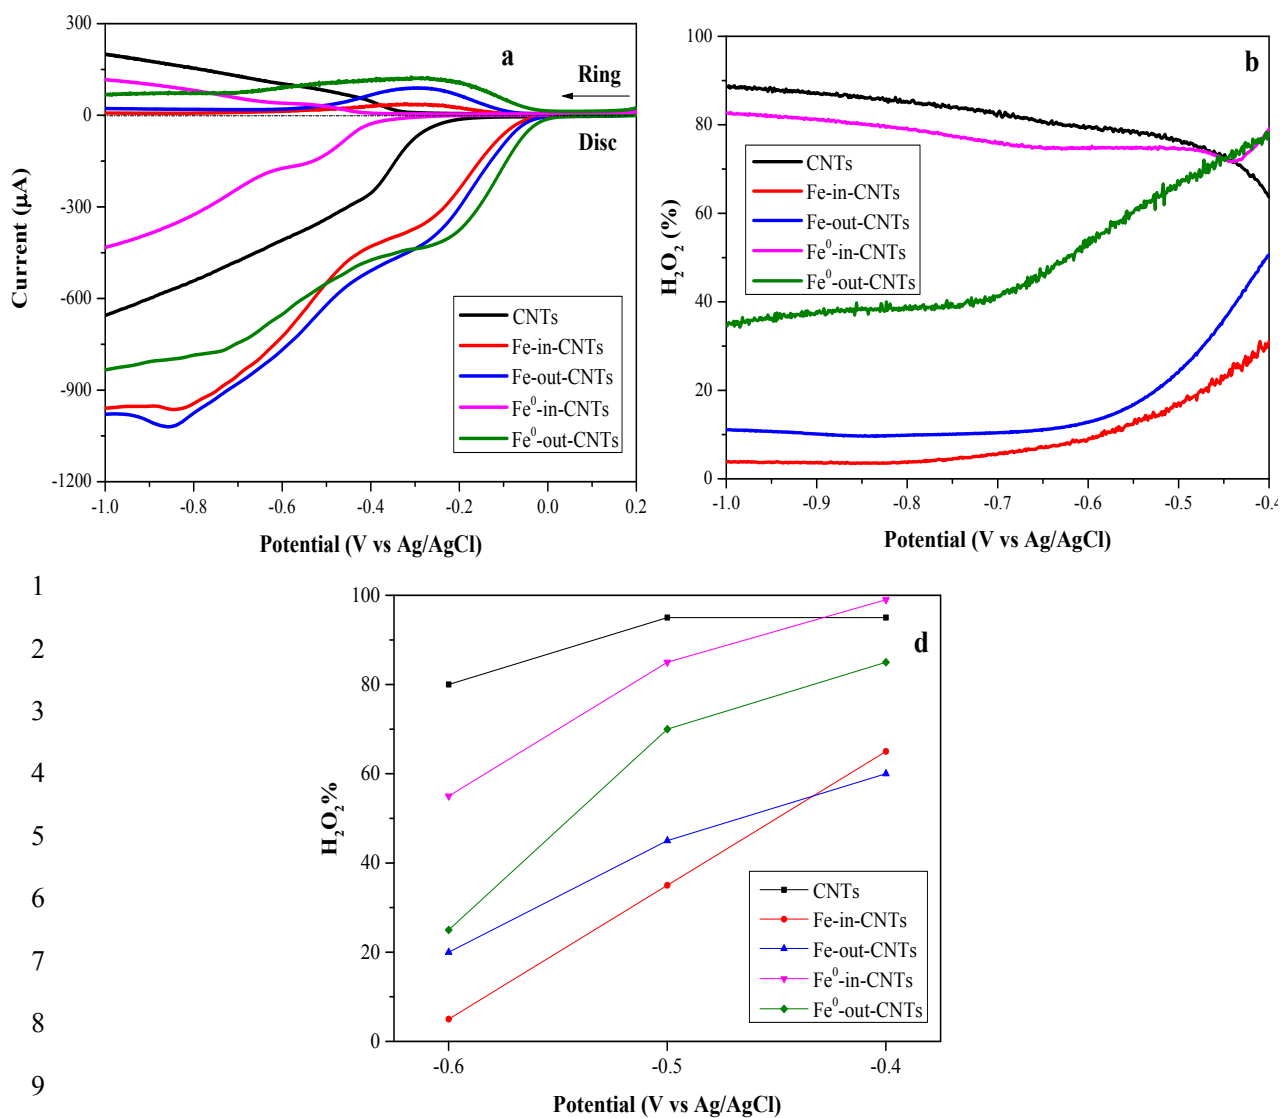

**Figure S3** Disk current and ring current of RRDE tests at 1600 rpm (  $\text{H}_2\text{O}_2$  selectivity from RRDE (b) and  $\text{H}_2\text{O}_2$  selectivity from RDE (c) of CNTs, Fe-in/out-CNTs, and Fe<sup>0</sup>-in/out-CNTs.

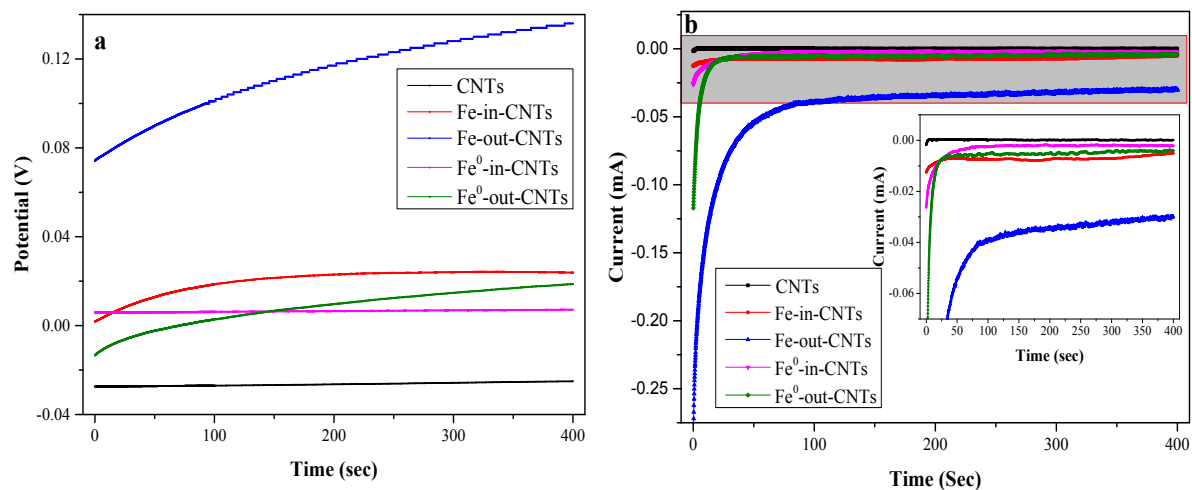

1  
2 **Figure S4** Stability tests of potential (a) and current (b) of CNTs, Fe-in/out-CNTs, and Fe<sup>0</sup>-in/out-  
3 CNTs GDE  
4  
5  
6  
7  
8  
9  
10  
11  
12  
13  
14

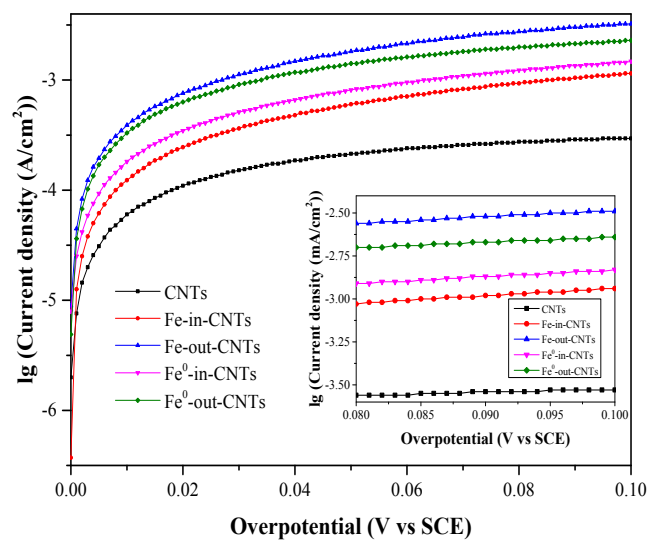

**Figure S5** Tafel plots of CNTs, Fe-in/out-CNTs, and Fe<sup>0</sup>-in/out-CNTs GDE



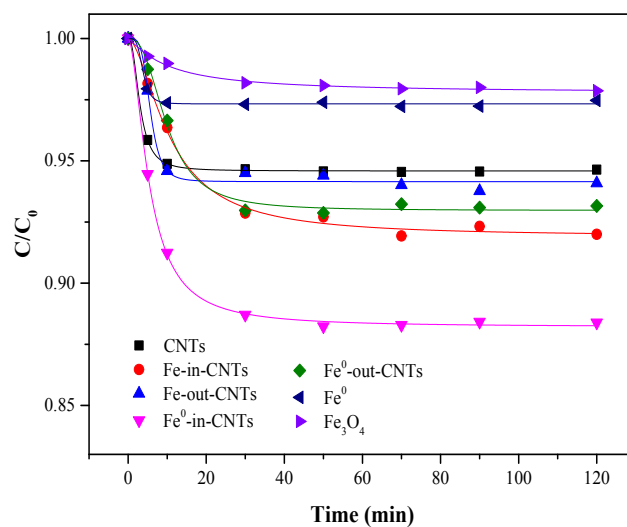

**Figure S6** Phenol removal by different catalyst powder without H<sub>2</sub>O<sub>2</sub>

Conditions: pH=3, [catalyst]=0.1 g/L, [Phenol]=50 mg/L

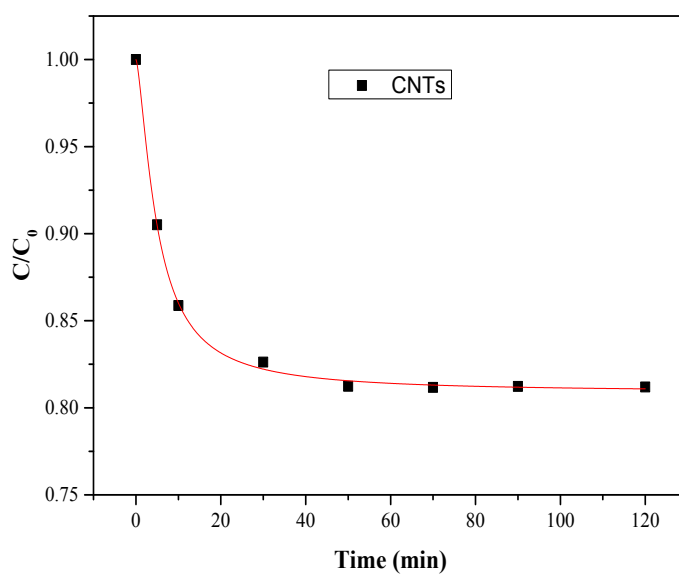

**Figure S7** Phenol removal by CNT modified GDE when H<sub>2</sub>O<sub>2</sub> was electro-synthesized

Conditions: V=300 ml, pH=3, I=60 mA, V<sub>air</sub>=0.4 L/min, [Phenol]=50 mg/L

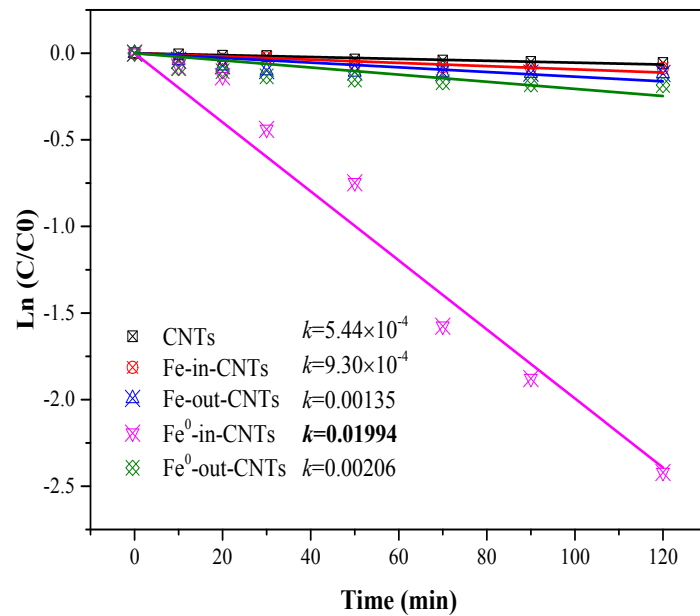

**Figure S8** Pseudo-first-order constant ( $k$ ) of phenol degradation by CNTs, Fe-in/out-CNTs and Fe<sup>0</sup>-in/out-CNTs GDE

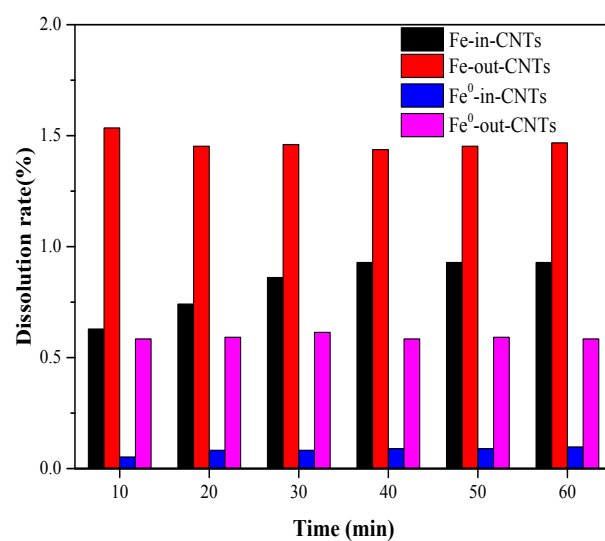

**Figure S9** Iron dissolution rate of Fe-in/out-CNTs and Fe<sup>0</sup>-in/out-CNTs GDE.

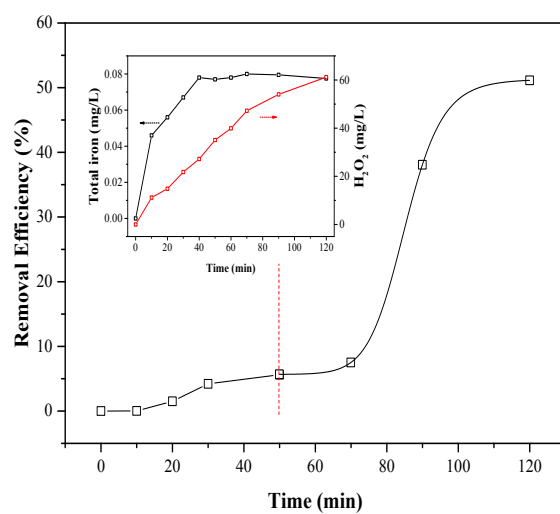

1

2

**Figure S10** Phenol removal efficiency of Fe<sup>0</sup>-in-CNTs GDE at neutral condition.

3

Condition: V=300 ml; pH=7; I=60 mA; V<sub>air</sub>=0.4 L/min; phenol concentration: 50 mg/L

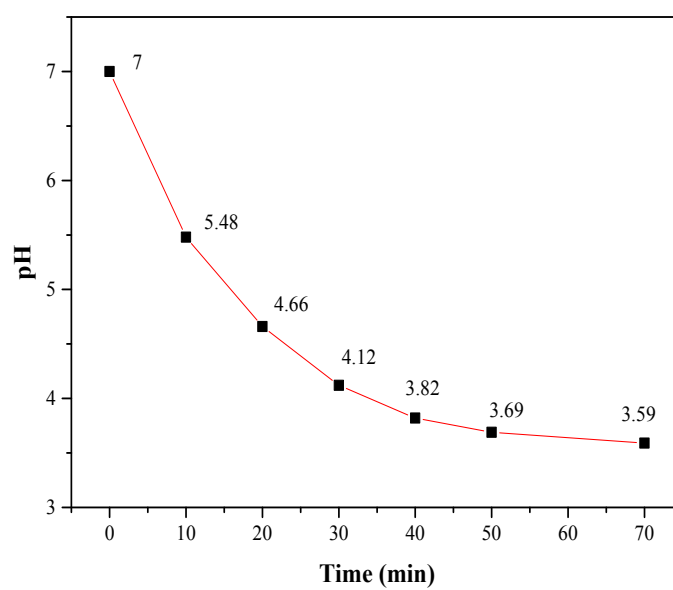

4

5

**Figure S11** pH change when phenol was removed at neutral condition by Fe<sup>0</sup>-in-CNTs GDE.

6

7

8

9

10

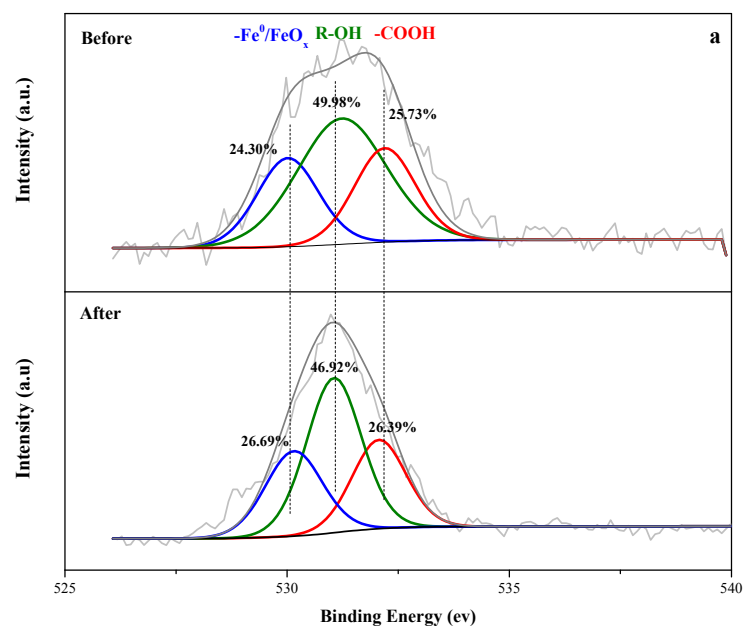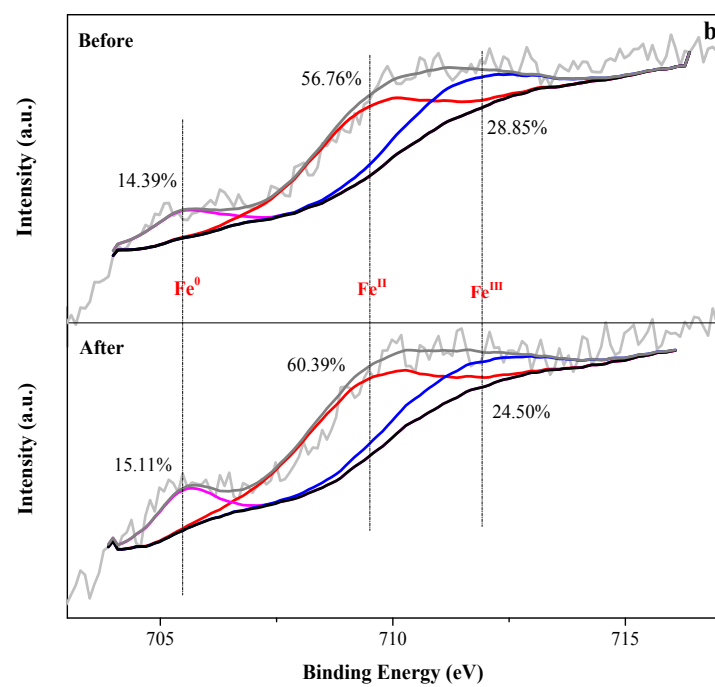

**Figure S12** O 1s (a) and Fe 2p (b) XPS spectra of the fresh and used Fe<sup>0</sup>-out-CNTs GDE.

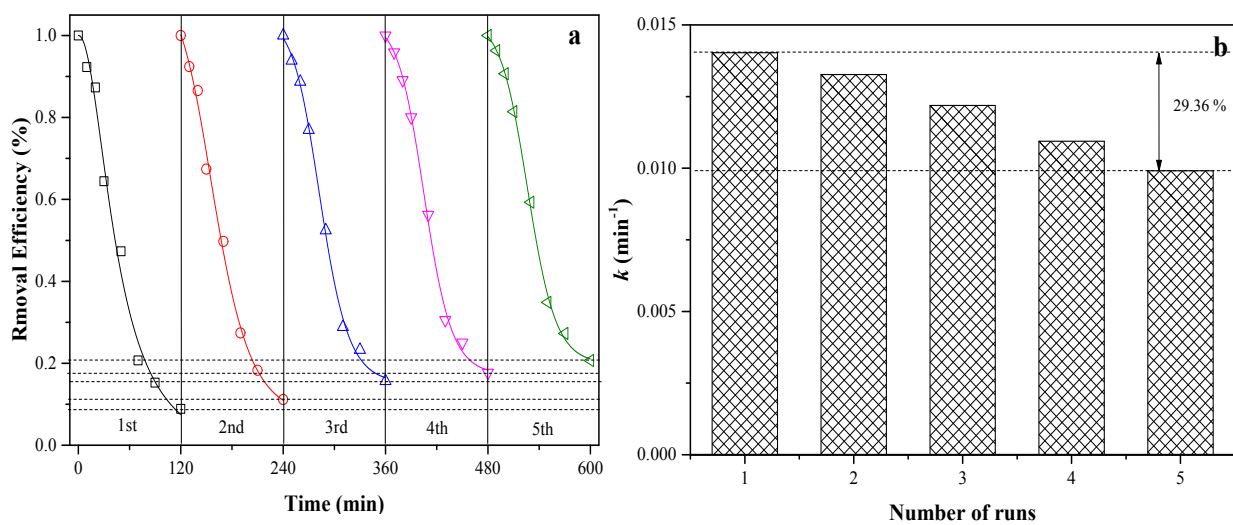

1

2 **Figure S13** Stability of the Fe<sup>0</sup>-in-CNTs GDE in the heterogeneous EF process over 5 cycles for

3 the (a) phenol removal and (b) rate constant.

4

5

6

7

8

9

10

11

12

13

14

15

16

17

18

19

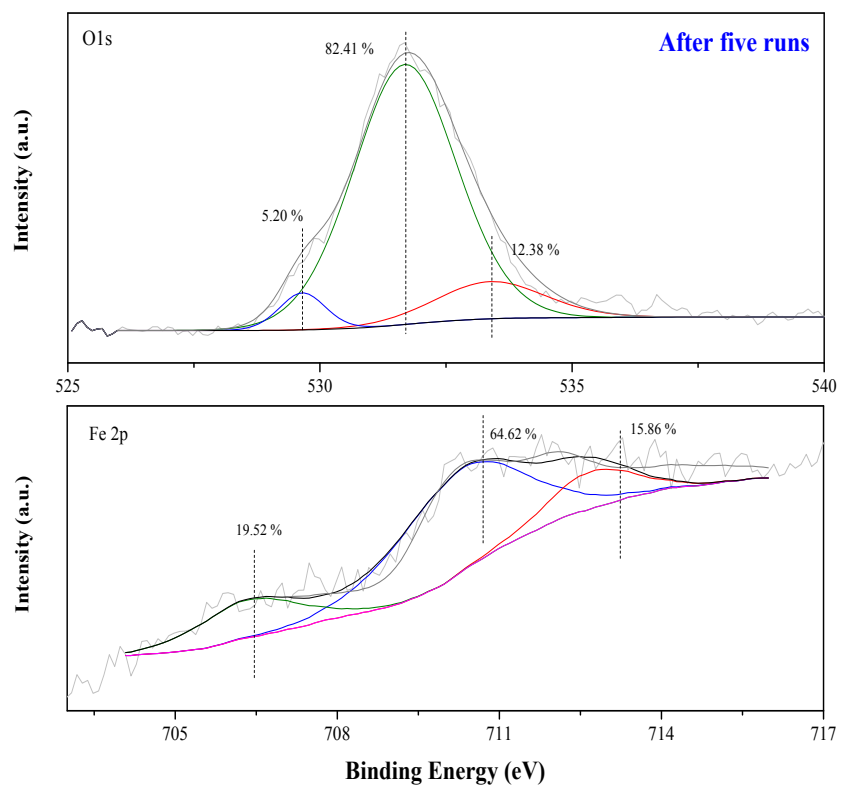

**Figure S14** O1s and Fe 2p XPS spectra of Fe<sup>0</sup>-in-CNTs GDE after five runs

1

2 **Table S1** Electrochemical parameters for the ORR, EIS and polarization curve

|                           | ORR                        |                                              | EIS                   |                          |                       | Tafel              |                                     |                 |                               |
|---------------------------|----------------------------|----------------------------------------------|-----------------------|--------------------------|-----------------------|--------------------|-------------------------------------|-----------------|-------------------------------|
| Materials                 | Reduction                  | Current density                              | $R_0$<br>( $\Omega$ ) | $R_{ct}$<br>( $\Omega$ ) | $R_d$<br>( $\Omega$ ) | $E_{corr}$<br>(mV) | $i_{corr}$<br>(mA/cm <sup>2</sup> ) | $C_R$<br>(mm/a) | $i_0$<br>(A/cm <sup>2</sup> ) |
|                           | peaks<br>(V vs<br>Ag/AgCl) | (mA/cm <sup>2</sup> , -0.8 V)<br>at 1600 rpm |                       |                          |                       |                    |                                     |                 |                               |
| CNTs                      | -0.419                     | 3.74                                         | 9.13                  | 8.37                     | 11.79                 | -                  | -                                   | -               | $8.8 \times 10^{-3}$          |
| Fe-in-CNTs                | -0.459                     | 3.96                                         | 6.04                  | 3.45                     | 48.58                 | -144               | 0.247                               | 2.86            | 0.18                          |
| Fe-out-CNTs               | -0.376                     | 4.50                                         | 6.10                  | 3.59                     | 38.08                 | -52                | 0.525                               | 6.09            | 0.17                          |
| Fe <sup>0</sup> -in-CNTs  | -0.432                     | 4.92                                         | 5.95                  | 1.57                     | 8.27                  | -189               | 0.170                               | 1.97            | 0.15                          |
| Fe <sup>0</sup> -out-CNTs | -0.391                     | 3.90                                         | 6.33                  | 3.06                     | 10.70                 | -182               | 0.501                               | 5.81            | 0.11                          |

3

4

5

6

7

8

9

10

11

12

13

14

15

16

17

18

19



1

2

| Cathode material                                                                         | Experimental Conditions                                                                                                                  | Iron leaching mass<br>(mg/cm <sup>2</sup> , ×10 <sup>-3</sup> ) | EEC<br>(kWh/kg H <sub>2</sub> O <sub>2</sub> ) | Pollutant Removal                           | Ref.      |
|------------------------------------------------------------------------------------------|------------------------------------------------------------------------------------------------------------------------------------------|-----------------------------------------------------------------|------------------------------------------------|---------------------------------------------|-----------|
| Fe@Fe <sub>2</sub> O <sub>3</sub> /active carbon fiber                                   | Anode: BDD; pH=3;<br>I=30 mA; t=60 min                                                                                                   | 18.2                                                            | -                                              | (30 mg/L Atrazine) 100 %                    | 2         |
| Fe@Fe <sub>2</sub> O <sub>3</sub> /active carbon fiber                                   | Anode: Bi <sub>2</sub> WO <sub>6</sub> /FTO electrode; pH=6.2;<br>Light source=300 W; V <sub>air</sub> =5 L/min;<br>I=0.3 mA; t=120 min; | 60.0                                                            | -                                              | (1.0×10 <sup>-5</sup> M Rhodamine B) 46.9 % | 3         |
| Fe <sub>3</sub> O <sub>4</sub> /gas diffusion cathode                                    | Anode: Pt sheet; pH=3<br>Cathode potential=-0.8 V; t=100 min;                                                                            | 460                                                             | -                                              | (50 mg/L Tetracycline) 94.2 %               | 4         |
| Fe <sub>3</sub> O <sub>4</sub> @Fe <sub>2</sub> O <sub>3</sub> /activated carbon aerogel | Anode: BDD; pH=3; Current density=10mA/cm <sup>2</sup> ; t=30 min;<br>Pure oxygen=0.02m <sup>3</sup> /h;                                 | 180                                                             | -                                              | (236.7 mg/L Imidacloprid) 90 %              | 5         |
| FeCu/Carbon aerogel                                                                      | Anode: BDD; pH=3; V=50 ml; t=60 min;<br>I=30 mA; U=5.8 V; V <sub>air</sub> =100 mL/min;                                                  | 3.75                                                            | 348                                            | (50 mg/L dimethyl phthalate) 93 %           | 6         |
| Fe <sup>II</sup> Fe <sup>III</sup> layered double hydroxide multiwall                    | Anode: Ti <sub>4</sub> O <sub>7</sub> anode; pH=3; V <sub>air</sub> =1 L/min;<br>t=50 min; Current density=7.5 mA/cm <sup>2</sup> ;      | 52.0                                                            | -                                              | (0.2 mM Sulfamethazine) 100 %               | 7         |
| Fe <sup>0</sup> -in-CNTs                                                                 | Anode: DSA; V=300 ml<br>t=60 min; V=300 ml; I=60 mA; V <sub>air</sub> =0.4 L/min; t=120 min                                              | (pH=3) 3.21                                                     | 32.80                                          | (50 mg/L phenol) 91.12 %                    | This work |

---

|             |       |                        |
|-------------|-------|------------------------|
| (pH=7) 1.67 | 26.05 | (50 mg/L phenol) 51.01 |
|             |       | %                      |

---

1 **Table S2.** Performance comparison of iron modified carbon materials with the literature.

2 -: not available

3

4 **References:**

- 5 1. D. Li, Y. Qu, J. Liu, W. He, H. Wang and Y. Feng, *J. Power Sources*, 2014, **272**, 909-914.
- 6 2. X. Ding, S. Wang, W. Shen, Y. Mu, L. Wang, H. Chen and L. Zhang, *Water Res.*, 2017, **112**, 9-18.
- 7 3. X. Ding, Z. Ai and L. Zhang, *J. Hazard. Mater.*, 2012, **239**, 233-40.
- 8 4. Y. Zhang, M. Gao, S.-G. Wang, W. Zhou, Y. Sang and X.-H Wang, *Electrochim. Acta*, 2017, **231**,
- 9 694-704.
- 10 5. H. Zhao, Y. Chen, Q. Peng, Q. Wang and G. Zhao, *Appl. Catal. B*, 2017, **203**, 127-137.
- 11 6. H. Zhao, L. Qian, Y. Chen, Q. Wang and G. Zhao, *Chem. Eng. J.*, 2018, **332**, 486-498.
- 12 7. S. Ganiyu, T. Huong Le, M. Bechelany, N. Oturan, S. Papirio, G. Esposito, E. Hullebusch, M.
- 13 Cretin and M. A. Oturan, *Chem. Eng. J.*, 2018, **350**, 844-855.
- 14
- 15
- 16
